# Supplementary material for: Oxidative catalytic versatility of a trivacant polyoxotungstate incorporated into MIL-101(Cr)
Source: Royal Society of Chemistry journal article supplement (doi:10.1039/c3cy00853c), 2014-01-01
Supplement: c3cy00853c1.pdf [file c3cy00853c1.pdf]

## SUPPORTING INFORMATION

### Oxidative Catalytic Versatility of Trivacant Polyoxotungstate Incorporated into MIL-101(Cr) †

Carlos M. Granadeiro,<sup>[a]</sup> André D. S. Barbosa,<sup>[a]</sup> Susana Ribeiro,<sup>[a]</sup> Isabel C. M. S. Santos,<sup>[b]</sup>  
Baltazar de Castro,<sup>[a]</sup> Luís Cunha-Silva\*<sup>[a]</sup> and Salette S. Balula\*<sup>[a]</sup>

<sup>[a]</sup> REQUIMTE & Department of Chemistry and Biochemistry, Faculty of Sciences,  
University of Porto, 4169-007 Porto, Portugal

<sup>[b]</sup> Department of Chemistry, QOPNA, University of Aveiro, 3810-193 Aveiro, Portugal

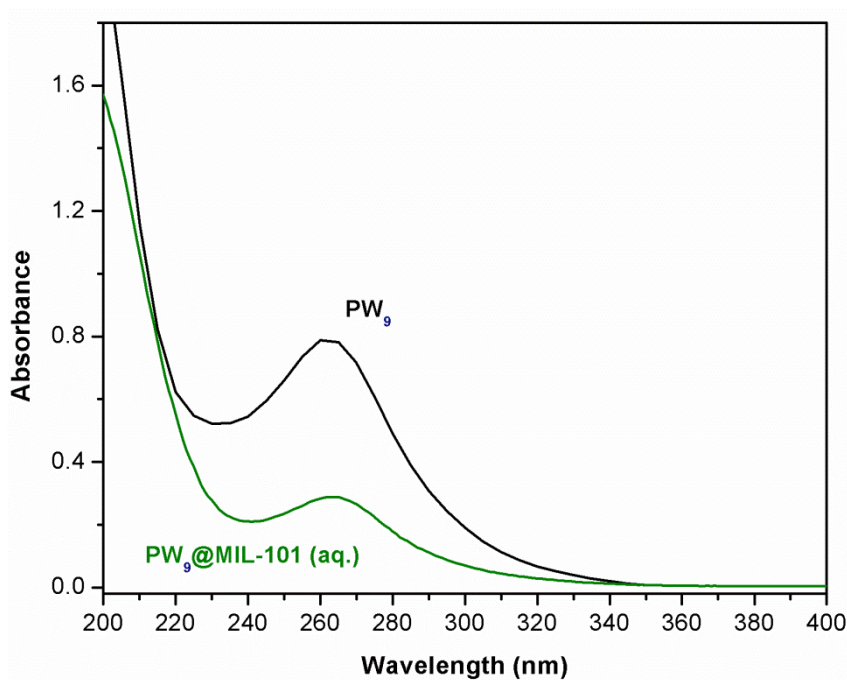

**Figure S1** UV-Vis spectra of the initial POM solution, PW<sub>9</sub>, and the solution after 24 h of reaction, PW<sub>9</sub>@MIL-101 (aq.).

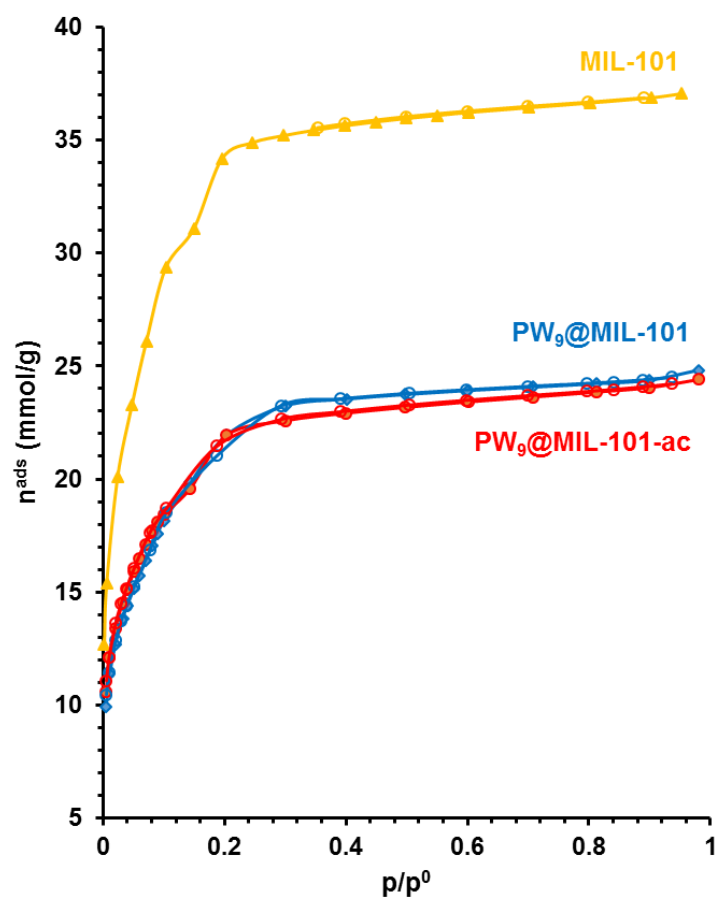

**Figure S2** The nitrogen adsorption-desorption isotherms of the materials at -196 °C: MIL-101(Cr) yellow,  $PW_9@MIL-101$  (blue) and  $PW_9@MIL-101-ac$  (red) (ac stands for after catalysis). The filled and unfilled symbols represent the adsorption and desorption processes, respectively.

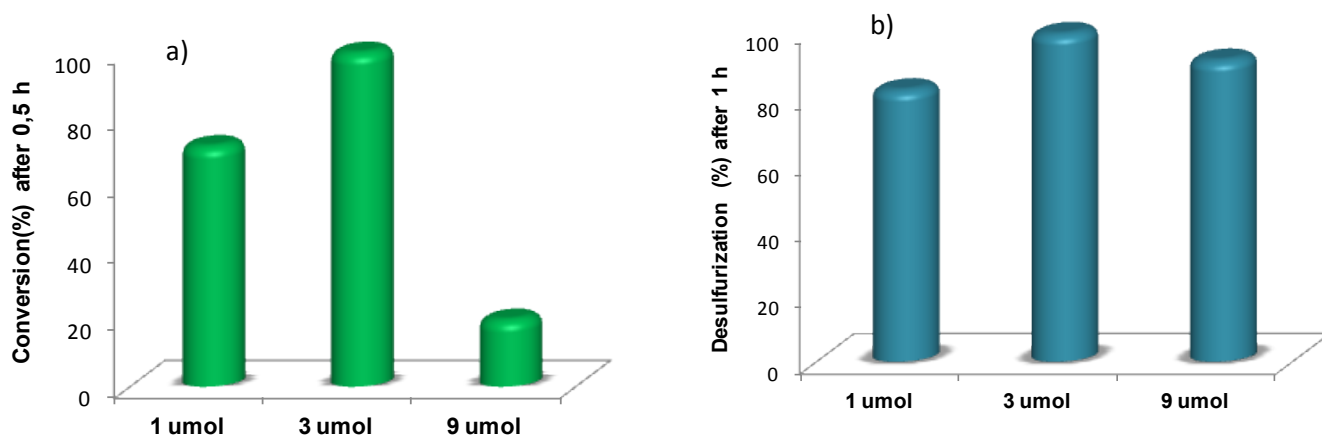

**Figure S3** a) conversion data obtained for geraniol oxidation catalyzed by  $\text{PW}_9@\text{MIL-101}$  containing 1, 3 and 9  $\mu\text{mol}$  of active center  $\text{PW}_9$ . b) Desulfurization of a model oil containing DBT, 1-BT and 4,6-DMDBT catalyzed by  $\text{PW}_9@\text{MIL-101}$  containing 1, 3 and 9  $\mu\text{mol}$  of active center  $\text{PW}_9$ .
